# Supplementary material
Source: PubMed Central journal article supplement (PMC8495892)
Supplement: NIHMS1742691-supplement-Supplemental_figures.pdf [file NIHMS1742691-supplement-Supplemental_figures.pdf]

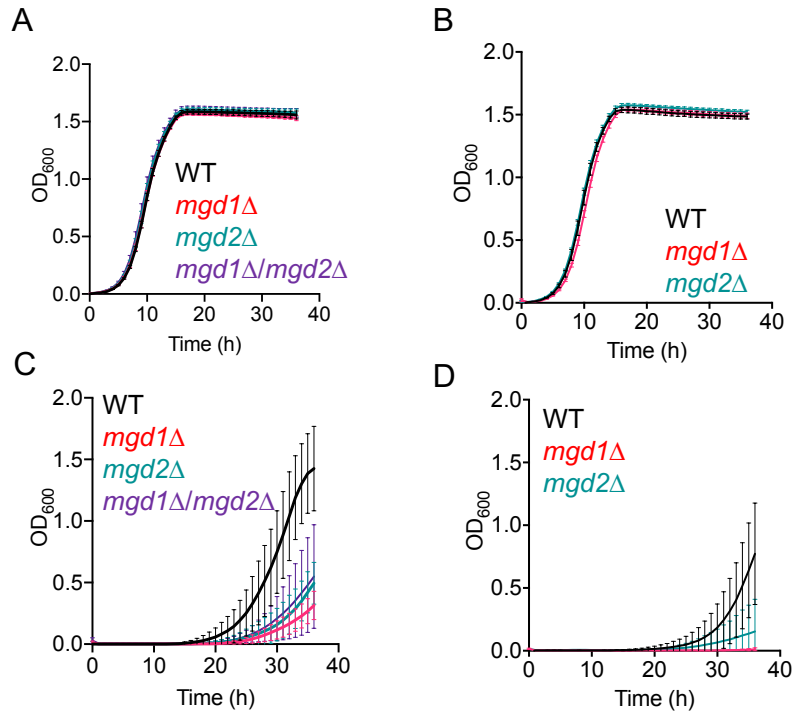

**Fig. S1. 15 mM MG inhibits growth in a strain-dependent manner.** Representative growth kinetics for *C. lusitaniae* strains grown in YPD in the absence (A, B) or presence (C,D) of 15 mM MG. S18 (A,C) or L17 (B,D) parental (black) and isogenic *mgd1*Δ (red), *mgd2*Δ (teal), and *mgd1*Δ/*mgd2*Δ (purple) mutants are shown. One representative experiment out of three (B,D) or five (A,C) independent experiments is shown, data summarized in Fig. 2B-D. Error bars indicate the standard deviation of technical replicates from the same experiment.

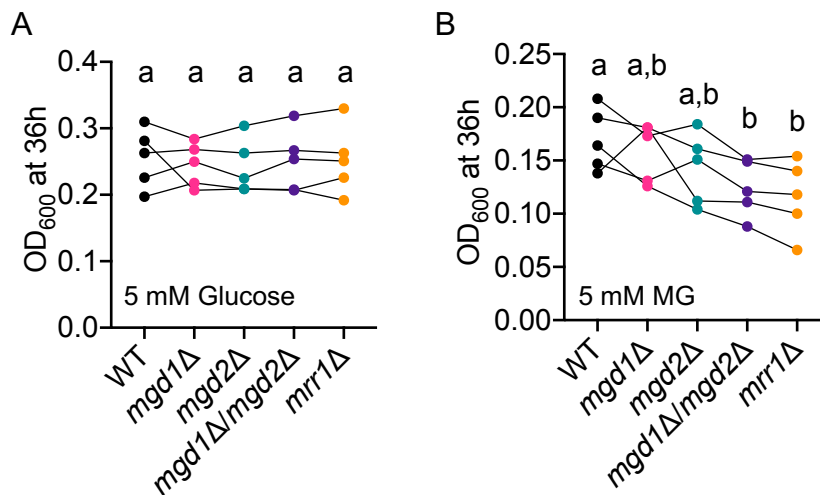

**Fig. S2. *MGD1*, *MGD2*, and *MRR1* play a role in MG catabolism.** *C. lusitaniae* S18 strains were grown in YNB medium supplemented with either 5 mM glucose (**A**) or 5 mM MG (**B**), and OD<sub>600</sub> was measured after 36 h of growth. RM one-way ANOVA with Geisser-Greenhouse correction and Tukey's multiple comparison test was used for statistical analysis; a-b, a-c, and b-c,  $p < 0.05$ . Data shown represent the mean OD<sub>600</sub> at 36 h from each of five independent experiments. Data points connected by line are from the same experiment.

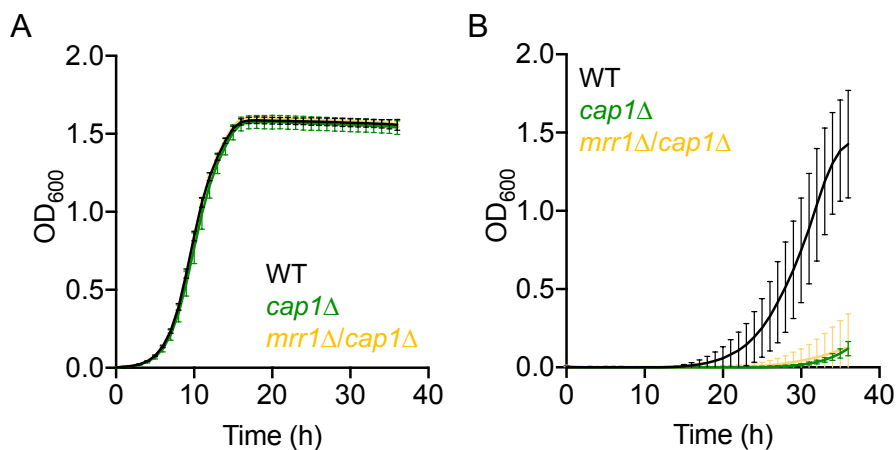

**Fig. S3. Loss of *CAP1* increased sensitivity to high concentrations of exogenous MG regardless of whether *MRR1* was present.** *C. lusitaniae* S18 (black), *cap1*Δ (green), and *mrr1*Δ/*cap1*Δ (yellow) were grown in YPD alone (**A**) or with 15 mM MG (**B**). One representative experiment out of three is shown. Error bars indicate the standard deviation of technical replicates from the same experiment.

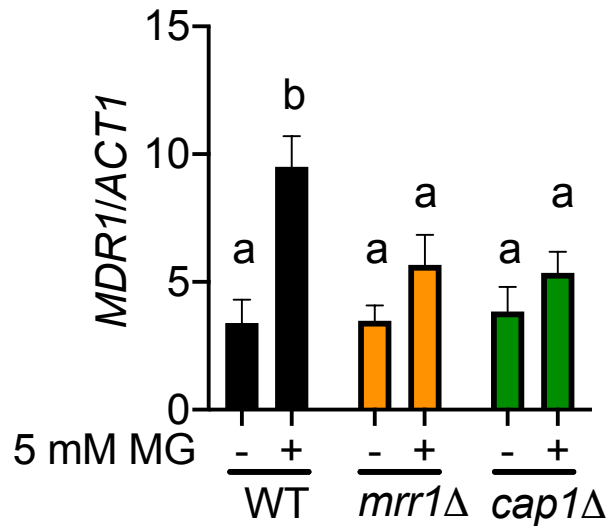

**Fig. S4. *MRR1* and *CAP1* play a role in MG-dependent *MDR1* induction in *C. lusitaniae* isolate L17.** Induction of *MDR1* in L17 WT (black), *mrr1*Δ (orange), and *cap1*Δ (green) following 15 minutes of exposure to 5 mM MG in YPD-grown exponential phase cells. Data shown represent the mean ± SD from three independent experiments. Ordinary two-way ANOVA with Tukey's multiple comparison test was used for statistical evaluation; a-b  $p < 0.01$ .

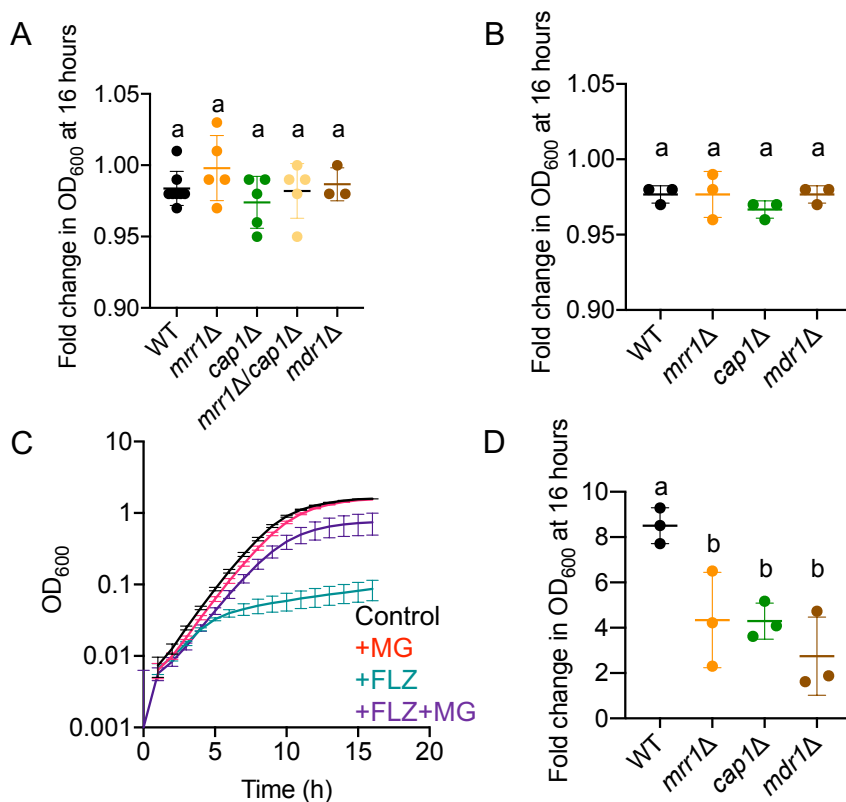

**Fig. S5. 5 mM MG increases growth in FLZ but not in YPD alone in isolates S18 and L17. (A)** Fold change in OD<sub>600</sub> after 16 hours of growth for indicated S18 strains in YPD versus YPD supplemented with 5 mM MG. Data shown represent the mean  $\pm$  SD from at least three independent experiments. Ordinary one-way ANOVA with Tukey's multiple comparison test was used for statistical evaluation; no strains were significantly different from one another. **(B)** Fold change in OD<sub>600</sub> after 16 hours of growth for indicated L17 strains in YPD versus YPD supplemented with 5 mM MG. Data shown represent the mean  $\pm$  SD from three independent experiments. Ordinary one-way ANOVA with Tukey's multiple comparison test was used for statistical evaluation; no strains were significantly different from one another. **(C)** Growth curve for L17 WT in YPD alone (black), or with 5 mM MG (red), FLZ (equal to the MIC) (teal), or FLZ + 5 mM MG (purple). Data shown represent the mean  $\pm$  SD from three independent experiments. **(D)** Fold difference in OD<sub>600</sub> after 16 hours of growth for indicated L17 strains in FLZ alone versus FLZ with 5 mM MG. Data shown represent the mean  $\pm$  SD from three independent experiments. Ordinary one-way ANOVA with Tukey's multiple comparison test was used for statistical evaluation; a-b,  $p < 0.05$ .

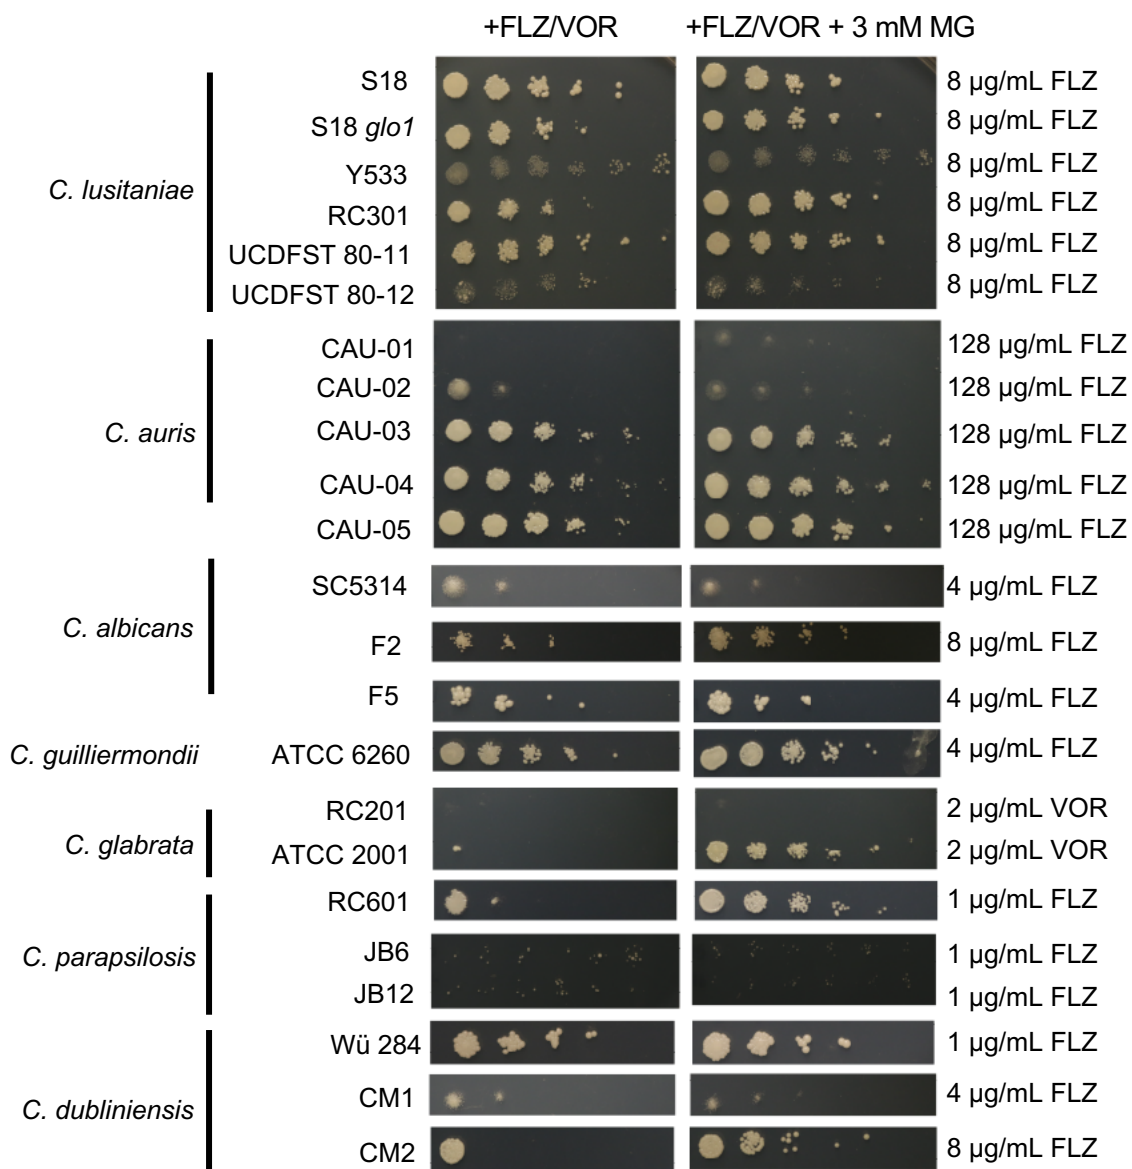

**Fig S6. Growth of all tested *Candida* strains on azoles with or without 3 mM MG.** Serial 1:10 dilutions of each *Candida* strain were spotted onto YNBG<sub>100</sub> with FLZ or VOR in the absence and presence of 3 mM MG, then grown at 37°C for two days. One representative experiment out of two independent experiments is shown.
