# Supplementary material
Source: PubMed Central journal article supplement (PMC8495892)
Supplement: NIHMS1742691-supplement-Table_S1.pdf [file NIHMS1742691-supplement-Table_S1.pdf]

**Table S1: Strains and plasmids used in this study**

| Strain                                                           | Lab #  | Species                  | Parent            | Relevant Characteristics or Genotype                                    | Source     |
|------------------------------------------------------------------|--------|--------------------------|-------------------|-------------------------------------------------------------------------|------------|
| <b>Fungal Strains</b>                                            |        |                          |                   |                                                                         |            |
| U04 (A04)                                                        | DH2949 | <i>C. lusitaniae</i>     |                   | Clinical isolate, FLZ-resistant, <i>MRR1</i> <sup>Y813C</sup>           | (1, 2)     |
| U04 <i>mrr1</i> Δ                                                | DH3306 | <i>C. lusitaniae</i>     | U04               | <i>mrr1</i> Δ:: <i>NAT1</i>                                             | (2)        |
| U04 <i>mrr1</i> Δ + <i>MRR1</i> <sup>Y813C</sup> (Y8)            | DH3613 | <i>C. lusitaniae</i>     | U04 <i>mrr1</i> Δ | <i>MRR1</i> <sup>Y813C</sup> - <i>HygB</i>                              | This study |
| U04 <i>mrr1</i> Δ + <i>MRR1</i> <sup>L1191H+Q1197*</sup> (L1Q1*) | DH3628 | <i>C. lusitaniae</i>     | U04 <i>mrr1</i> Δ | <i>MRR1</i> <sup>L1191H+Q1197*</sup> - <i>HygB</i>                      | This study |
| U05                                                              | DH3087 | <i>C. lusitaniae</i>     |                   | Clinical isolate, FLZ-susceptible, <i>MRR1</i> <sup>L1191H+Q1197*</sup> | (2)        |
| L14                                                              | DH3088 | <i>C. lusitaniae</i>     |                   | Clinical isolate, FLZ-susceptible, <i>MRR1</i> <sup>L1191H+Q1197*</sup> | (2)        |
| L17                                                              | DH3101 | <i>C. lusitaniae</i>     |                   | Clinical isolate, FLZ-resistant, <i>MRR1</i> <sup>H467L</sup>           | (2)        |
| L17 <i>mrr1</i> Δ                                                | DH3110 | <i>C. lusitaniae</i>     | L17               | <i>mrr1</i> Δ:: <i>NAT1</i>                                             | (2)        |
| L17 <i>cap1</i> Δ                                                | DH3720 | <i>C. lusitaniae</i>     | L17               | <i>cap1</i> Δ:: <i>NAT1</i>                                             | This study |
| L17 <i>mgd1</i> Δ                                                | DH3724 | <i>C. lusitaniae</i>     | L17               | <i>mgd1</i> Δ:: <i>NAT1</i>                                             | This study |
| L17 <i>mgd2</i> Δ                                                | DH3726 | <i>C. lusitaniae</i>     | L17               | <i>mgd2</i> Δ:: <i>NAT1</i>                                             | This study |
| S18                                                              | DH3102 | <i>C. lusitaniae</i>     |                   | Clinical isolate, FLZ-resistant, <i>MRR1</i> <sup>H467L</sup>           | (2)        |
| S18 <i>mrr1</i> Δ                                                | DH3718 | <i>C. lusitaniae</i>     | S18               | <i>mrr1</i> Δ:: <i>NAT1</i>                                             | This study |
| S18 <i>cap1</i> Δ                                                | DH3719 | <i>C. lusitaniae</i>     | S18               | <i>cap1</i> Δ:: <i>HygB</i>                                             | This study |
| S18 <i>mrr1</i> Δ/ <i>cap1</i> Δ                                 | DH3721 | <i>C. lusitaniae</i>     | S18 <i>cap1</i> Δ | <i>cap1</i> Δ:: <i>HygB</i> / <i>mrr1</i> Δ:: <i>NAT1</i>               | This study |
| S18 <i>mdr1</i> Δ                                                | DH3722 | <i>C. lusitaniae</i>     | S18               | <i>mdr1</i> Δ:: <i>HygB</i>                                             | This study |
| S18 <i>mgd1</i> Δ                                                | DH3723 | <i>C. lusitaniae</i>     | S18               | <i>mgd1</i> Δ:: <i>NAT1</i>                                             | This study |
| S18 <i>mgd2</i> Δ                                                | DH3725 | <i>C. lusitaniae</i>     | S18               | <i>mgd2</i> Δ:: <i>HygB</i>                                             | This study |
| S18 <i>mgd1</i> Δ/ <i>mgd2</i> Δ                                 | DH3727 | <i>C. lusitaniae</i>     | S18 <i>mgd1</i> Δ | <i>mgd1</i> Δ:: <i>NAT1</i> / <i>mgd2</i> Δ:: <i>HygB</i>               | This study |
| S18 <i>glo1</i> Δ                                                | DH3728 | <i>C. lusitaniae</i>     | S18               | <i>glo1</i> Δ:: <i>NAT1</i>                                             | This study |
| SC5314                                                           | DH35   | <i>C. albicans</i>       |                   | Wild-type <i>C. albicans</i> lab strain                                 | (3)        |
| F2                                                               | DH3550 | <i>C. albicans</i>       |                   | Clinical isolate, FLZ-susceptible                                       | (4)        |
| F5                                                               | DH3551 | <i>C. albicans</i>       |                   | Clinical isolate, FLZ-resistant                                         | (4)        |
| Wü284                                                            | DH2178 | <i>C. dubliniensis</i>   |                   | Clinical isolate                                                        | (5)        |
| CM1                                                              | DH3575 | <i>C. dubliniensis</i>   |                   | Clinical isolate, FLZ-susceptible                                       | (6)        |
| CM2                                                              | DH3576 | <i>C. dubliniensis</i>   |                   | Clinical isolate, FLZ-resistant                                         | (6)        |
| RC-601                                                           | DH1989 | <i>C. parapsilosis</i>   |                   | Clinical isolate                                                        | (7)        |
| JB6                                                              | DH3595 | <i>C. parapsilosis</i>   |                   | CLIB24 <i>mrr1</i> Δ + <i>MRR1</i> <sup>Q1064P</sup>                    | (8)        |
| JB12                                                             | DH3596 | <i>C. parapsilosis</i>   |                   | CLIB24 <i>mrr1</i> Δ + <i>MRR1</i> <sup>K873N</sup>                     | (8)        |
| ATCC 6260 (RC-401)                                               | DH1984 | <i>C. guilliermondii</i> |                   | Clinical isolate                                                        | (7)        |

|           |        |                      |                  |      |
|-----------|--------|----------------------|------------------|------|
| RC-201    | DH1986 | <i>C. glabrata</i>   | Clinical isolate | (7)  |
| ATCC 2001 | DH2788 | <i>C. glabrata</i>   | Clinical isolate | (9)  |
| CAU-01    | DH2768 | <i>C. auris</i>      | Clinical isolate | (10) |
| CAU-02    | DH2769 | <i>C. auris</i>      | Clinical isolate | (10) |
| CAU-03    | DH2770 | <i>C. auris</i>      | Clinical isolate | (10) |
| CAU-04    | DH2771 | <i>C. auris</i>      | Clinical isolate | (10) |
| CAU-05    | DH2772 | <i>C. auris</i>      | Clinical isolate | (10) |
| Y533      | DH1981 | <i>C. lusitaniae</i> | Clinical isolate | (11) |
| RC-301    | DH1987 | <i>C. lusitaniae</i> | Clinical isolate | (7)  |

|              |        |                      |                       |                                                                  |
|--------------|--------|----------------------|-----------------------|------------------------------------------------------------------|
| UCDFST 80-11 | DH3119 | <i>C. lusitaniae</i> | Environmental isolate | Phaff Yeast Culture Collection, University of California, Davis* |
| UCDFST 80-11 | DH3120 | <i>C. lusitaniae</i> | Environmental isolate | Phaff Yeast Culture Collection, University of California, Davis* |

#### Plasmids in *E. coli* (DH5 $\alpha$ )

|                                     |        |                |                                                                                                                         |            |
|-------------------------------------|--------|----------------|-------------------------------------------------------------------------------------------------------------------------|------------|
| pMQ30 <sup>MRR1-L1191H+Q1197*</sup> | DH3829 | <i>E. coli</i> | <i>MRR1</i> <sup>L1191H+Q1197*</sup> - <i>HygB</i> complementation, Gent <sup>R</sup>                                   | This study |
| pMQ30 <sup>MRR1-Y813C</sup>         | DH3831 | <i>E. coli</i> | <i>MRR1</i> <sup>Y813C</sup> - <i>HygB</i> complementation, Gent <sup>R</sup>                                           | This study |
| pNAT                                | DH2664 | <i>E. coli</i> | TEF1p- <i>NAT1</i> , Amp/Carb <sup>R</sup>                                                                              | (12)       |
| pYM70                               | DH3352 | <i>E. coli</i> | TEF2p- <i>HygB</i> , Amp/Carb <sup>R</sup>                                                                              | (13)       |
| pGEM- <i>URA3</i>                   | DH3316 | <i>E. coli</i> | pGEM-T (Promega) containing <i>CaURA3</i> , Gent <sup>R</sup>                                                           | (14)       |
| pMQ30                               | DH2620 | <i>E. coli</i> | Plasmid that replicates in <i>S. cerevisiae</i> and <i>E. coli</i> , using uracil or gentamycin selection, respectively | (15)       |

<sup>a</sup>UCDFST, Phaff Yeast Culture Collection, Food Science and Technology, University of California

Davis; ATCC, American Type Culture Collection.

#### References

1. Grahl N, Demers EG, Crocker AW, Hogan DA. Use of RNA-protein complexes for genome editing in non-albicans *Candida* species. *mSphere*. 2017;2(3).
2. Demers EG, Biermann AR, Masonjones S, Crocker AW, Ashare A, Stajich JE, et al. Evolution of drug resistance in an antifungal-naive chronic *Candida lusitaniae* infection. *Proc Natl Acad Sci U S A*. 2018;115(47):12040-5.
3. Gillum AM, Tsay EYH, Kirsch DR. Isolation of the *Candida-Albicans* gene for orotidine-5'-phosphate decarboxylase by complementation of *S. Cerevisiae* Ura3 and *Escherichia Coli* Pyr<sup>r</sup> mutations. *Mol Gen Genet*. 1984;198(1):179-82.

4. Franz R, Kelly SL, Lamb DC, Kelly DE, Ruhnke M, Morschhauser J. Multiple molecular mechanisms contribute to a stepwise development of fluconazole resistance in clinical *Candida albicans* strains. *Antimicrob Agents Chemother.* 1998;42(12):3065-72.
5. Morschhauser J, Ruhnke M, Michel S, Hacker J. Identification of CARE-2-negative *Candida albicans* isolates as *Candida dubliniensis*. *Mycoses.* 1999;42(1-2):29-32.
6. Moran GP, Sullivan DJ, Henman MC, McCreary CE, Harrington BJ, Shanley DB, et al. Antifungal drug susceptibilities of oral *Candida dubliniensis* isolates from human immunodeficiency virus (HIV)-infected and non-HIV-infected subjects and generation of stable fluconazole-resistant derivatives in vitro. *Antimicrob Agents Chemother.* 1997;41(3):617-23.
7. Alex D, Gay-Andrieu F, May J, Thampi L, Dou DF, Mooney A, et al. Amino acid-derived 1,2-benzisothiazolinone derivatives as novel small-molecule antifungal inhibitors: identification of potential genetic targets. *Antimicrob Agents Ch.* 2012;56(9):4630-9.
8. Branco J, Silva AP, Silva RM, Silva-Dias A, Pina-Vaz C, Butler G, et al. Fluconazole and voriconazole resistance in *Candida parapsilosis* is conferred by gain-of-function mutations in *MRR1* transcription factor gene. *Antimicrob Agents Chemother.* 2015;59(10):6629-33.
9. Gregori C, Schueller C, Roetzer A, Schwarzmuller T, Ammerer G, Kuchler K. The high-osmolarity glycerol response pathway in the human fungal pathogen *Candida glabrata* strain ATCC 2001 lacks a signaling branch that operates in baker's yeast. *Eukaryotic Cell.* 2007;6(9):1635-45.
10. Pathirana RU, Friedman J, Norris HL, Salvatori O, McCall AD, Kay J, et al. Fluconazole-resistant *Candida auris* is susceptible to salivary histatin 5 killing and to intrinsic host defenses. *Antimicrob Agents Ch.* 2018;62(2).
11. Rex JH, Cooper CR, Jr., Merz WG, Galgiani JN, Anaissie EJ. Detection of amphotericin B-resistant *Candida* isolates in a broth-based system. *Antimicrob Agents Chemother.* 1995;39(4):906-9.
12. Min K, Ichikawa Y, Woolford CA, Mitchell AP. *Candida albicans* Gene Deletion with a Transient CRISPR-Cas9 System. *mSphere.* 2016;1(3).
13. Basso LR, Jr., Bartiss A, Mao Y, Gast CE, Coelho PS, Snyder M, et al. Transformation of *Candida albicans* with a synthetic hygromycin B resistance gene. *Yeast.* 2010;27(12):1039-48.
14. Wilson RB, Davis D, Mitchell AP. Rapid hypothesis testing with *Candida albicans* through gene disruption with short homology regions. *J Bacteriol.* 1999;181(6):1868-74.
15. Shanks RM, Caiazza NC, Hinsa SM, Toutain CM, O'Toole GA. *Saccharomyces cerevisiae*-based molecular tool kit for manipulation of genes from gram-negative bacteria. *Appl Environ Microbiol.* 2006;72(7):5027-36.

\*Available at <https://phaffcollection.ucdavis.edu>
