# Supplementary material
Source: PubMed Central journal article supplement (PMC8495892)
Supplement: NIHMS1742691-supplement-Table_S2.pdf [file NIHMS1742691-supplement-Table_S2.pdf]

**Table S2: Primers and crRNA used in this study**

| Name   | Description                                                              | Sequence                                                                    | Reference  |
|--------|--------------------------------------------------------------------------|-----------------------------------------------------------------------------|------------|
| AB001  | Forward to make left flank of knockout construct for <i>MRR1</i>         | 5'- AAG GCG TGT CCT TCA TGT T - 3'                                          | (1)        |
| AB003  | Reverse to make left flank of knockout construct for <i>MRR1</i>         | 5' - AAC GTC GTG ACT GGG AAA AAT CAT TAG<br>CTT CGC TGG AAT TTC TGT TT - 3' | (1)        |
| AB004  | Forward to make right flank of knockout construct for <i>MRR1</i>        | 5' - TAT CCG CTC ACA ATT CCA CTG CTC GGT<br>TCT GGT TCT ATA TG - 3'         | (1)        |
| AB006  | Reverse to make right flank of knockout construct for <i>MRR1</i>        | 5' - GAG TAC GTG GAT CTC TAC TTG ATG - 3'                                   | (1)        |
| AB007  | Nested forward to amplify across stitched <i>MRR1</i> knockout construct | 5' - CTT TGC TTG TTT GGG AAA CCT C - 3'                                     | (1)        |
| AB008  | Nested reverse to amplify across stitched <i>MRR1</i> knockout construct | 5' - TGG CAT TGA ACC CGG AAA - 3'                                           | (1)        |
| AB009  | Forward to amplify <i>NAT1</i> for <i>MRR1</i> knockout construct        | 5' - AAA CAG AAA TTC CAG CGA AGC TAA TGA<br>TTT TTC CCA GTC ACG ACG TT - 3' | (1)        |
| AB010  | Reverse to amplify <i>NAT1</i> for <i>MRR1</i> knockout construct        | 5' - CAT ATA GAA CCA GAA CCG AGC AGT<br>GGA ATT GTG AGC GGA TA - 3'         | (1)        |
| ED058  | Forward for RT-PCR of <i>MDR1</i>                                        | 5' - TCCATCCATGGGTCCATTATTC                                                 | (1)        |
| ED059  | Reverse for RT-PCR of <i>MDR1</i>                                        | 5' – CTCAACACAAGGAAAGCACATC – 3'                                            | (1)        |
| ACT1-F | Forward for RT-PCR of <i>ACT1</i>                                        | 5' – GTA TCG CTG AGC GTA TGC AA – 3'                                        | (2)        |
| ACT1-R | Reverse for RT-PCR of <i>ACT1</i>                                        | 5' – GAT GGA TGG TCC AGA CTC GT – 3'                                        | (2)        |
| AB023  | Forward to make left flank of knockout construct for <i>MGD1</i>         | 5' - CCG AAG AAT GAG CTA CGA GAA T - 3'                                     | This study |
| AB024  | Reverse to make left flank of knockout construct for <i>MGD1</i>         | 5' - AAC GTC GTG ACT GGG AAA AAT CAT TAT<br>TTG GGT TGC TCT CGT GTT - 3'    | This study |
| AB025  | Forward to make right flank of knockout construct for <i>MGD1</i>        | 5' - TAT CCG CTC ACA ATT CCA CAA ATC CGG<br>ACA TTG AGG ACT ATC - 3'        | This study |
| AB026  | Reverse to make right flank of knockout construct for <i>MGD1</i>        | 5' - CGG AGT ATC GTA TCC CAA CAA TAA - 3'                                   | This study |
| AB027  | Nested forward to amplify across stitched <i>MGD1</i> knockout construct | 5' - AAC GAA GTG TAT GCA CAT TTG AC - 3'                                    | This study |
| AB028  | Nested reverse to amplify across stitched                                | 5' - AGA TCG CAA TCT CCT TAA TGC T - 3'                                     | This study |

|       |                                                                                     |                                                                              |            |
|-------|-------------------------------------------------------------------------------------|------------------------------------------------------------------------------|------------|
|       | <i>MGD1</i> knockout construct                                                      |                                                                              |            |
| AB029 | Forward to amplify <i>NAT1</i> for <i>MGD1</i> knockout construct                   | 5' - AAC ACG AGA GCA ACC CAA ATA ATG ATT<br>TTT CCC AGT CAC GAC GTT - 3'     | This study |
| AB030 | Reverse to amplify <i>NAT1</i> for <i>MGD1</i> knockout construct                   | 5' - GAT AGT CCT CAA TGT CCG GAT TTG TGG<br>AAT TGT GAG CGG ATA - 3'         | This study |
| AB039 | Forward for RT-PCR of <i>MGD1</i>                                                   | 5' - CGC AGA AAT CCC TAA AGT AAA T - 3'                                      | This study |
| AB040 | Reverse for RT-PCR of <i>MGD1</i>                                                   | 5' - TAC CCT TTG CTT CGT TCT T - 3'                                          | This study |
| AB043 | Forward to make left flank of knockout construct for <i>GLO1</i>                    | 5' - GGC ATA TCT GCC ACT AGG AAA G - 3'                                      | This study |
| AB044 | Reverse to make left flank of knockout construct for <i>GLO1</i>                    | 5' - AAC GTC GTG ACT GGG AAA AAT CAT TAC<br>TTT AAT AAG CAG GCC GGA GT - 3'  | This study |
| AB045 | Forward to make right flank of knockout construct for <i>GLO1</i>                   | 5' - TAT CCG CTC ACA ATT CCA TTG TAC GAG<br>GAA GCG AGA A - 3'               | This study |
| AB046 | Reverse to make right flank of knockout construct for <i>GLO1</i>                   | 5' - CCT TGA TCT TAG GCT CCA ACT T - 3'                                      | This study |
| AB047 | Nested forward to amplify across stitched <i>GLO1</i> knockout construct            | 5' - GAT CGG TGA GTG TGG TTC TTT - 3'                                        | This study |
| AB048 | Nested reverse to amplify across stitched <i>GLO1</i> knockout construct            | 5' - GCC GCC AAT GAA GAT GTT TG - 3'                                         | This study |
| AB049 | Forward to amplify <i>NAT1</i> for <i>GLO1</i> knockout construct                   | 5' - ACT CCG GCC TGC TTA TTA AAG TAA TGA<br>TTT TTC CCA GTC ACG ACG TT - 3'  | This study |
| AB050 | Reverse to amplify <i>NAT1</i> for <i>GLO1</i> knockout construct                   | 5' - TTC TCG CTT CCT CGT ACA ATG GTG GAA<br>TTG TGA GCG GAT A - 3'           | This study |
| AB051 | Forward for RT-PCR of <i>MGD2</i>                                                   | 5' - CAG AGA TAC CTA AAG CCT TT - 3'                                         | This study |
| AB052 | Reverse for RT-PCR of <i>MGD2</i>                                                   | 5' - TCC AAG ATG GTC TGT TGT G - 3'                                          | This study |
| AB053 | Forward to make left flank of knockout construct for <i>MGD2</i>                    | 5' - GCT GTA GTC TGT AAG GTT AGG TC - 3'                                     | This study |
| AB054 | Reverse to make left flank of knockout construct for <i>MGD2</i> using <i>NAT1</i>  | 5' - AAC GTC GTG ACT GGG AAA AAT CAT<br>TAG GTT CAG GCC ATA TTG ACT TTG - 3' | This study |
| AB055 | Forward to make right flank of knockout construct for <i>MGD2</i> using <i>NAT1</i> | 5' - TAT CCG CTC ACA ATT CCA CGG TTT CAA<br>GCT ACT TAG TGT ATG G - 3'       | This study |

|       |                                                                                     |                                                                           |            |
|-------|-------------------------------------------------------------------------------------|---------------------------------------------------------------------------|------------|
| AB056 | Reverse to make right flank of knockout construct for <i>MGD2</i>                   | 5' – TGA GTA TGA GGA AGG GTG ATA TTC - 3'                                 | This study |
| AB057 | Nested forward to amplify across stitched <i>MGD2</i> knockout construct            | 5' – GCA TTT ATT GGA GTA TTG GAG ATG G - 3'                               | This study |
| AB058 | Nested reverse to amplify across stitched <i>MGD2</i> knockout construct            | 5' – GTG TTC ATG ATC ATT GGG CAT AG - 3'                                  | This study |
| AB059 | Forward to amplify <i>NAT1</i> for <i>MGD2</i> knockout construct                   | 5' – CAA AGT CAA TAT GGC CTG AAC CTA ATG ATT TTT CCC AGT CAC GAC GTT - 3' | This study |
| AB060 | Reverse to amplify <i>NAT1</i> for <i>MGD2</i> knockout construct                   | 5' – CCA TAC ACT AAG TAG CTT GAA ACC GTG GAA TTG TGA GCG GAT A - 3'       | This study |
| AB069 | Forward to make left flank of knockout construct for <i>CAP1</i>                    | 5' - TCA ACA GAA GTA GTG CCT GTA T - 3'                                   | This study |
| AB070 | Reverse to make left flank of knockout construct for <i>CAP1</i> using <i>NAT1</i>  | 5' - AAC GTC GTG ACT GGG AAA AAT CAT TAG CTT TAA CGG CAA GGA GTT AG - 3'  | This study |
| AB071 | Forward to make right flank of knockout construct for <i>CAP1</i> using <i>NAT1</i> | 5' - TAT CCG CTC ACA ATT CCA CGA AAC GGA CAG CGT AGT TAG T - 3'           | This study |
| AB072 | Reverse to make right flank of knockout construct for <i>CAP1</i>                   | 5' - CAG CTT CTC CGT GTA TCG TTT A - 3'                                   | This study |
| AB073 | Nested forward to amplify across stitched <i>CAP1</i> knockout construct            | 5' - CGC TTC TTT ACG CAT TGT AAC C - 3'                                   | This study |
| AB074 | Nested reverse to amplify across stitched <i>CAP1</i> knockout construct            | 5' - CAG CGT ATT CGA CCC ATC TT - 3'                                      | This study |
| AB075 | Forward to amplify <i>NAT1</i> for <i>CAP1</i> knockout construct                   | 5' - CTA ACT CCT TGC CGT TAA AGC TAA TGA TTT TTC CCA GTC ACG ACG TT - 3'  | This study |
| AB076 | Reverse to amplify <i>NAT1</i> for <i>CAP1</i> knockout construct                   | 5' - ACT AAC TAC GCT GTC CGT TTC GTG GAA TTG TGA GCG GAT A - 3'           | This study |
| AB092 | Reverse to make left flank of knockout construct for <i>CAP1</i> using <i>HygB</i>  | 5' - GAC GTC AGG TGG CAC TTT TCG GGG GCT TTA ACG GCA AGG AGT TAG - 3'     | This study |
| AB093 | Forward to amplify <i>HygB</i> for <i>CAP1</i> knockout construct                   | 5' - CTA ACT CCT TGC CGT TAA AGC CCC CGA AAA GTG CCA CCT GAC GTC - 3'     | This study |
| AB094 | Reverse to amplify <i>HygB</i> for <i>CAP1</i> knockout construct                   | 5' - ACT AAC TAC GCT GTC CGT TTC GGC CTC GTG ATA CGC CTA TT - 3'          | This study |

|       |                                                                                              |                                                                                                               |            |
|-------|----------------------------------------------------------------------------------------------|---------------------------------------------------------------------------------------------------------------|------------|
| AB095 | Forward to make right flank of knockout construct for <i>CAP1</i> using <i>HygB</i>          | 5' - AAT AGG CGT ATC ACG AGG CCG AAA<br>CGG ACA GCG TAG TTA GT - 3'                                           | This study |
| AB122 | Forward to amplify <i>MGD2</i> MMEJ construct with <i>HygB</i>                               | 5' - GCG TAT AAT TAT TCC GTG TAT GTT GAA<br>CTT CGG AAT TAA ACC CAA CGG GGT ATA<br>GTG CTT GCT GTT CGA T - 3' | This study |
| AB123 | Reverse to amplify <i>MGD2</i> MMEJ construct with <i>HygB</i>                               | 5' - CCT TAA TTG TGC GAA CGT ACA TGA AAT<br>CCT CAG TAT ATC ACA AAT CTT GCA TTT TAT<br>GAT GGA ATG AAT G - 3' | This study |
| ED038 | Forward to make left flank of knockout construct for <i>MDR1</i>                             | 5' - CAG TAG TGT GTT CGT CTC CTT AG - 3'                                                                      | (1)        |
| ED042 | Nested forward to amplify across stitched <i>MDR1</i> knockout construct                     | 5' - CGG CGG AGT TAT ATC CGT TTC - 3'                                                                         | (1)        |
| ED043 | Nested reverse to amplify across stitched <i>MDR1</i> knockout construct                     | 5' - GGC TTC CGT ATT TAA GCT GTA CT - 3'                                                                      | (1)        |
| ED048 | Reverse to make right flank of knockout construct for <i>MDR1</i>                            | 5' - CCG ACC CTC CCA TTC AAT C - 3'                                                                           | (1)        |
| ED103 | Forward to amplify <i>MRR1</i> and 1kb upstream w/ homology to pMQ30                         | 5' - TTT TCC CAG TCA CGA CGT TGT AAA ACG<br>ACG GCC GCG GCC GCA AGG CGT GTC CTT<br>CAT GTT - 3'               | This study |
| ED110 | Reverse to amplify 1 kb downstream <i>MRR1</i> w/ homology to pMQ30                          | 5' - CGG ATA ACA ATT TCA CAC AGG AAA<br>CAG CTA TGA CCC GGA GCT TTT CAT CAC<br>CAC CA - 3'                    | This study |
| ED115 | Reverse to amplify <i>MRR1</i> and 1kb upstream w/ homology to <i>HygB</i>                   | 5' - AGC AAT ATC GAA CAG CAA GCA CTA TAT<br>CTA GAG GTT TAC GAC GGA ACT AGC TGC T<br>- 3'                     | This study |
| ED121 | Forward to amplify <i>HygB</i> w/ homology to <i>MRR1</i> (swap for <i>URA3</i> )            | 5' - TAG TTC AAC TCA GCA GCT AGT TCC GTC<br>GTA AAC CTC TAG ATA TAG TGC TTG CTG<br>TTC GAT - 3'               | This study |
| ED122 | Reverse to amplify <i>HygB</i> w/ homology to <i>MRR1</i> downstream (swap for <i>URA3</i> ) | 5' - CTG ATG TGC CGA TCA ATG AGT CAG<br>AAA CAG CCT GTA TTT TAT GAT GGA ATG<br>AAT GGG ATG - 3'               | This study |
| ED125 | Forward upstream of <i>MRR1</i> to validate complement                                       | 5' - GAA AAA GAA GCC AGC AGA CC - 3'                                                                          | This study |
| ED126 | Reverse downstream of <i>MRR1</i> to validate complement                                     | 5' - GGG TAA AGC CAT TGC AGA C - 3'                                                                           | This study |
| ED187 | Reverse to make left flank of knockout construct for <i>MDR1</i> using <i>HygB</i>           | 5' - GCA ATA TCG AAC AGC AAG CAC TAT<br>AGC GAT TAG GTA TTA GAT GGA TGT TTG - 3'                              | This study |
| ED188 | Forward to amplify <i>HygB</i> for <i>MDR1</i> knockout construct                            | 5' - CAA ACA TCC ATC TAA TAC CTA ATC GCT<br>ATA GTG CTT GCT GTT CGA TAT TGC - 3'                              | This study |

|                      |                                                                                     |                                                                                 |            |
|----------------------|-------------------------------------------------------------------------------------|---------------------------------------------------------------------------------|------------|
| ED189                | Reverse to amplify <i>HygB</i> for <i>MDR1</i> knockout construct                   | 5' – CCT GAA CAA TTA CCT TGT GAA CTC ATT<br>TTA TGA TGG AAT GAA TGG G – 3'      | This study |
| ED190                | Forward to make right flank of knockout construct for <i>MDR1</i> using <i>HygB</i> | 5' – CCC ATT CAT TCC ATC ATA AAA TGA GTT<br>CAC AAG GTA ATT GTT CAG G – 3'      | This study |
| NG_087               | Reverse <i>NAT1</i> internal, for validation                                        | 5' – GAA GTT CCA GTT GAT CCA CCA TTG A –<br>3'                                  | (3)        |
| rev seq <i>NAT1</i>  | Forward <i>NAT1</i> internal, for validation                                        | 5' – CGA TGG TAC TGC TTC CGA TGG – 3'                                           | (3)        |
| ED123                | Reverse <i>HygB</i> internal, for validation                                        | 5' – CAT AAC CTC TAC CAC CAA CAT C – 3'                                         | This study |
| ED124                | Forward <i>HygB</i> internal, for validation                                        | 5' – GCT CAA GGT AGA TGT GAT GC – 3'                                            | This study |
| POP01                | Forward to amplify <i>CaURA3</i> w/ homology to pNAT                                | 5' – ACA TCC GAA CAT AAA CAA CCA TGA<br>CAG TCA ACA CTA AG – 3'                 | This study |
| POP02                | Reverse to amplify <i>CaURA3</i> w/ homology to pNAT                                | 5' – AAT CTT TTT ATT GTC AGT ATT TAT AAT<br>TGG CCA GTT TTT TTC – 3'            | This study |
| POP03                | Forward to amplify pNAT, replacing <i>NAT1</i> w/ <i>CaURA3</i>                     | 5' – ATA CTG ACA ATA AAA AGA TTC TTG TTT<br>TCA AGA ACT TGT CAT TTG TAT AG – 3' | This study |
| POP04                | Reverse to amplify pNAT, replacing <i>NAT1</i> w/ <i>CaURA3</i>                     | 5' – GGT TGT TTA TGT TCG GAT GTG ATG TGA<br>GAA CTG TAT C – 3'                  | This study |
| POP18                | Reverse to validate pTEF1- <i>URA3</i>                                              | 5' - CAG GAA ACA GCT ATG ACC ATG – 3'                                           | This study |
| POP19                | Forward to validate pTEF1- <i>URA3</i>                                              | 5' - CGT ACA TTT AGC CCA TAC ATC C – 3'                                         | This study |
| <i>MDR1</i> crRNA    | crRNA for <i>MDR1</i>                                                               | 5' – AGT CCT TGC TTG GCC ACA GG – 3'                                            | (1)        |
| <i>MRR1</i> crRNA    | crRNA for <i>MRR1</i>                                                               | 5' – TTC ATC ACT AAA GAT GAT GG – 3'                                            | (1)        |
| <i>CAP1</i> crRNA    | crRNA for <i>CAP1</i>                                                               | 5' – AAC CAC ACA CAA AAC CAG GG – 3'                                            | This study |
| <i>MGD1</i> crRNA    | crRNA for <i>MGD1</i>                                                               | 5' – GGA GAA AGG ATA CTC CGT GG – 3'                                            | This study |
| <i>MGD2</i> crRNA    | crRNA for <i>MGD2</i> (used with <i>NAT1</i> construct)                             | 5' – GAA AAA GTT TGC TGA AAA GG – 3'                                            | This study |
| <i>MGD2</i> 5' crRNA | crRNA for <i>MGD2</i> (used with <i>HYGB</i> construct)                             | 5' – GGG AAA GAC TAC AGA TAA GG – 3'                                            | This study |
| <i>MGD2</i> 3' crRNA | crRNA for <i>MGD2</i> (used with <i>HYGB</i> construct)                             | 5' – CTA TAC CGA TAA TCT GGA CT – 3'                                            | This study |
| <i>GLO1</i> crRNA    | crRNA for <i>GLO1</i>                                                               | 5' – TGG CCA CAT TTG TAT CAC GG – 3'                                            | This study |
| <i>NAT1</i> crRNA    | crRNA for <i>NAT1</i> (making <i>MRR1</i> complement strains)                       | 5' – GGG AAA ACC TTA GTC AAT GG – 3'                                            | This study |

## References

1. Demers EG, Biermann AR, Masonjones S, Crocker AW, Ashare A, Stajich JE, et al. Evolution of drug resistance in an antifungal-naive chronic *Candida lusitanae* infection. Proc Natl Acad Sci U S A. 2018;115(47):12040-5.
2. Asner SA, Giulieri S, Diezi M, Marchetti O, Sanglard D. Acquired Multidrug Antifungal Resistance in *Candida lusitanae* during Therapy. Antimicrob Agents Chemother. 2015;59(12):7715-22.
3. Grahl N, Demers EG, Crocker AW, Hogan DA. Use of RNA-protein complexes for genome editing in non-*albicans* *Candida* species. mSphere. 2017;2(3): e00218-17.
